# Supplementary material
Source: PubMed Central journal article supplement (PMC4017987)
Supplement: ml200113y_si_001.pdf [file ml200113y_si_001.pdf]

## Discovery and Hit-to-Lead Optimization of Non-ATP Competitive (MAPKAPK2) MK2 Inhibitors

Xiaohua Huang,<sup>\*,†</sup> Gerald W. Shipps, Jr.,<sup>†</sup> Cliff C. Cheng, Peter Spacciapoli,<sup>†</sup> Xingmin Zhang, Mark A. McCoy,<sup>‡</sup> Daniel F. Wyss,<sup>‡</sup> Xianshu Yang,<sup>†</sup> Abdelghani Achab,<sup>†</sup> Kyle Soucy, Donna K. Montavon, Denise M. Murphy, and Charles E. Whitehurst<sup>\*,†</sup>

Merck Research Laboratories, 320 Bent Street, Cambridge, Massachusetts 02141.

<sup>†</sup>Present address: Merck Research Laboratories, 33 Avenue Louis Pasteur, Boston, Massachusetts 02115.

<sup>‡</sup>Present address: Merck Research Laboratories, 2000 Galloping Hill Road, Kenilworth, New Jersey 07033

### Supporting Information

#### Commonly used abbreviations

|         |                                                                                              |
|---------|----------------------------------------------------------------------------------------------|
| ACN     | Acetonitrile                                                                                 |
| AcOH    | Acetic acid                                                                                  |
| DCM     | Dichloromethane                                                                              |
| DIEA    | Diisopropylethylamine                                                                        |
| DMF     | Dimethylformamide                                                                            |
| DMSO    | Dimethyl sulfoxide                                                                           |
| EtOAc   | Ethyl acetate                                                                                |
| EtOH    | Ethanol                                                                                      |
| HATU    | <i>O</i> -(7-Azabenzotriazol-1-yl)- <i>N,N,N',N'</i> -tetramethyluronium hexafluorophosphate |
| Hex     | hexanes                                                                                      |
| HPLC    | High pressure liquid chromatography                                                          |
| LCMS    | Liquid chromatography mass spectrometry                                                      |
| NMR     | Nuclear magnetic resonance                                                                   |
| RT      | Room temperature                                                                             |
| TEA     | Triethylamine                                                                                |
| TFA     | Trifluoroacetic acid                                                                         |
| THF     | Tetrahydrofuran                                                                              |
| hIRAK4  | Human interleukin-1 receptor-associated kinase 4                                             |
| hCAMk4  | Human calcium/calmodulin-dependent protein kinase IV                                         |
| hCHK1   | Human checkpoint homolog kinase 1                                                            |
| hMET    | Human met proto-oncogene kinase                                                              |
| hMST2   | Human serine/threonine kinase 3                                                              |
| hTSSk2  | Human testis-specific serine kinase 2                                                        |
| hROCK2  | Human Rho-associated coiled-coil containing protein kinase 2                                 |
| hIGF1R  | Human insulin-like growth factor 1 receptor                                                  |
| hAKT1   | Human v-akt murine thymoma viral oncogene homolog 1 (also known as PKB)                      |
| hIkkB   | Human inhibitor of nuclear factor kappa-B kinase subunit beta                                |
| hLCK    | Human Lymphocyte specific protein tyrosine kinase                                            |
| hCSNk1D | Human casein kinase 1, delta                                                                 |

## Section I: Synthetic Chemistry and Key Compound Characterization

The purity of all the compounds in the manuscript was  $\geq 95\%$ , determined by NMR, LC/MS.

### (A) Synthesis of compound **1**:

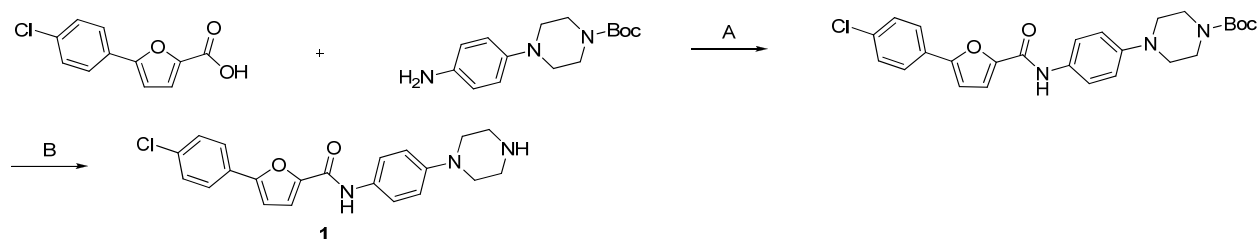

### Step A

To a mixture of 5-(4-chlorophenyl)furan-2-carboxylic acid (0.22 g, 1.0 mmol) and HATU (0.38 g, 1.0 mmol) in DMF (3 mL) was added DIEA (0.35 mL, 2.0 mmol) and *tert*-butyl 4-(4-aminophenyl)piperazine-1-carboxylate (0.42 g, 1.5 mmol). The reaction mixture was stirred at room temperature for overnight, and concentrated. The residue was purified by chromatography on silica gel column. *tert*-Butyl 4-(4-(5-(4-chlorophenyl)furan-2-carboxamido)phenyl)piperazine-1-carboxylate (0.48 g, 99% yield) was eluted with a solvent mixture of hexane and EtOAc (1:1).  $^1\text{H}$  NMR (500 MHz,  $\text{CDCl}_3$ )  $\delta$  8.19 (s, 1H), 7.64 (d,  $J = 9.0$  Hz, 2H), 7.57 (d,  $J = 9.0$  Hz, 2H), 7.35 (d,  $J = 8.5$  Hz, 2H), 7.24 (d,  $J = 3.5$  Hz, 1H), 6.90 (d,  $J = 9.0$  Hz, 2H), 6.72 (d,  $J = 3.5$  Hz, 1H), 3.56 (t,  $J = 5.0$  Hz, 4H), 3.08 (t,  $J = 5.0$  Hz, 4H), 1.48 (s, 9H).  $^{13}\text{C}$  NMR (125 MHz,  $\text{CDCl}_3$ )  $\delta$  156.0, 154.8, 154.6, 148.5, 147.3, 134.6, 130.3, 129.2, 128.1, 125.8, 121.7, 117.23, 117.16, 108.1, 80.0, 49.8, 29.8, 28.5.

### Step B

*tert*-Butyl 4-(4-(5-(4-chlorophenyl)furan-2-carboxamido)phenyl)piperazine-1-carboxylate (0.1 g, 0.2 mmol) was stirred in TFA (neat, 1 mL) at room temperature for 15 minutes. The solution was concentrated. The residue was purified by reverse phase HPLC to give compound **1** (75 mg, 95% yield) as an HCl salt.  $^1\text{H}$  NMR (500 MHz,  $\text{DMSO}-d_6$ )  $\delta$  10.22 (s, 1H), 9.50 (br s, 2H), 8.00 (dd,  $J = 6.5, 2.0$  Hz, 2H), 7.69 (d,  $J = 9.0$  Hz, 2H), 7.56 (dd,  $J = 7.0, 2.0$  Hz, 2H), 7.42 (d,  $J = 4.0$  Hz, 1H), 7.22 (d,  $J = 3.5$  Hz, 1H), 7.07 (d,  $J = 9.0$  Hz, 2H), 3.23 (s, 4H).  $^{13}\text{C}$  NMR (125 MHz,  $\text{DMSO}-d_6$ )  $\delta$  155.8, 153.9, 147.1, 145.9, 133.2, 131.8, 129.0, 128.3, 126.3, 121.9, 116.8, 116.7, 108.6, 46.2, 42.4. Mass calcd for  $\text{C}_{21}\text{H}_{21}\text{ClN}_3\text{O}_2^+$  ( $\text{M}+\text{H}$ ) $^+$  382.13168; Found 382.13141.

### (B) Synthesis of compound **9**:

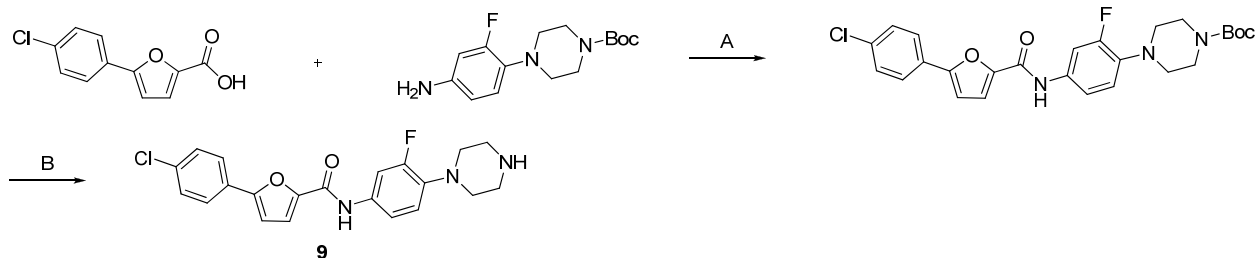

Reagents and conditions: (A) HATU, DIEA, DMF, rt; (B) TFA.

## Step A

To a mixture of 5-(4-chlorophenyl)furan-2-carboxylic acid (0.22 g, 1.0 mmol) and HATU (0.42 g, 1.1 mmol) in ACN (3 mL) was added DIEA (0.35 mL, 2.0 mmol) and *tert*-butyl 4-(4-amino-2-fluorophenyl)piperazine-1-carboxylate (0.35 g, 1.2 mmol). The reaction mixture was stirred at room temperature for overnight. The precipitates were filtered, washed with ACN and dried in *vacuo*. The product, *tert*-butyl 4-(4-(5-(4-chlorophenyl)furan-2-carboxamido)-2-fluorophenyl)piperazine-1-carboxylate, was obtained as a white solid (0.44 g, 87% yield).  $^1\text{H}$  NMR (500 MHz,  $\text{CDCl}_3$ )  $\delta$  8.12 (s, 1H), 7.65 (d,  $J$  = 8.5 Hz, 2H), 7.58 (dd,  $J$  = 14.0, 2.5 Hz, 1H), 7.39 (d,  $J$  = 8.5 Hz, 2H), 7.28 (d,  $J$  = 3.5 Hz, 1H), 7.30–7.25 (m, 1H), 6.90 (t,  $J$  = 9.0 Hz, 1H), 6.76 (d,  $J$  = 3.5 Hz, 1H), 3.59 (t,  $J$  = 5.0 Hz, 4H), 3.00 (t,  $J$  = 5.0 Hz, 4H), 1.48 (s, 9H).  $^{19}\text{F}$  NMR (470 MHz,  $\text{CDCl}_3$ )  $\delta$  -121.04 (dd<sub>H-F</sub>,  $J$  = 13.6, 9.4 Hz).  $^{13}\text{C}$  NMR (125 MHz,  $\text{CDCl}_3$ )  $\delta$  156.6, 156.1, 155.01, 154.97, 154.7, 147.0, 137.0, 136.9, 135.0, 132.8, 132.7, 129.4, 128.1, 126.0, 119.53, 119.50, 117.82, 116.21, 116.18, 109.5, 109.3, 108.4, 80.1, 50.9, 28.7, observed complexity due to C-F coupling.

## Step B

*tert*-butyl 4-(4-(5-(4-chlorophenyl)furan-2-carboxamido)-2-fluorophenyl)piperazine-1-carboxylate (80 mg, 0.16 mmol) was stirred in TFA (neat, 1 mL) at room temperature for 15 minutes. The solution was concentrated. The residue was purified by reverse phase HPLC to give compound **9** (64 mg, 100% yield) as an HCl salt.  $^1\text{H}$  NMR (500 MHz,  $\text{CD}_3\text{OD}$ )  $\delta$  7.94–7.90 (m, 2H), 7.69 (dd,  $J$  = 14.5, 2.5 Hz, 1H), 7.50–7.47 (m, 1H), 7.47–7.44 (m, 2H), 7.36 (d,  $J$  = 4.0 Hz, 1H), 7.13 (t,  $J$  = 9.5 Hz, 1H), 7.01 (d,  $J$  = 4.0 Hz, 1H), 3.43–3.39 (m, 4H), 3.37–3.32 (m, 4H).  $^{19}\text{F}$  NMR (470 MHz,  $\text{CD}_3\text{OD}$ )  $\delta$  -123.73 (dd<sub>H-F</sub>,  $J$  = 14.1, 9.4 Hz).  $^{13}\text{C}$  NMR (125 MHz,  $\text{DMSO}-d_6$ )  $\delta$  155.9, 155.3, 154.2, 153.3, 146.7, 134.7, 134.6, 134.34, 134.26, 133.3, 129.1, 128.2, 126.3, 119.6, 117.4, 116.7, 109.0, 108.8, 108.7, 47.3, 42.8, observed complexity due to C-F coupling. Mass calcd for  $\text{C}_{21}\text{H}_{20}\text{ClFN}_3\text{O}_2^+$  ( $\text{M}+\text{H}$ ) $^+$  400.12226; Found 400.12215.

## (C) Synthesis of compound **25**:

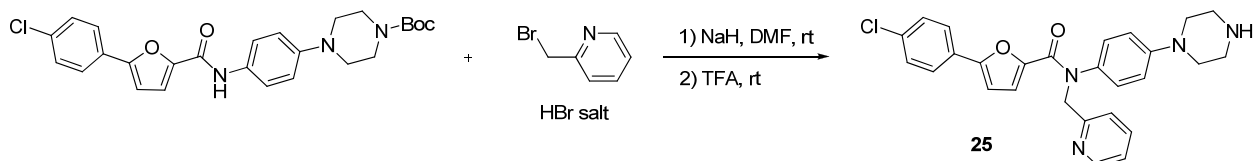

To a solution of *tert*-butyl 4-(4-(5-(4-chlorophenyl)furan-2-carboxamido)phenyl)piperazine-1-carboxylate (0.12 g, 0.24 mmol) in DMF (1 mL) at room temperature was added sodium

hydride (21 mg, 0.53 mmol, 60% in mineral oil), followed by the HBr salt of 2-(bromomethyl)pyridine (72 mg, 0.29 mmol). The reaction mixture was stirred at room temperature for overnight. HPLC analysis of the crude reaction mixture showed clean conversion of starting material to the desired product. The mixture was concentrated. To the residue was added TFA (neat, 1 mL). The reaction mixture was stirred at room temperature for 15 minutes. The solution was concentrated. The residue was purified by reverse phase HPLC to give compound **25** (98 mg, 87% yield) as an HCl salt. <sup>1</sup>H NMR (500 MHz, DMSO-*d*<sub>6</sub>) δ 9.60 (br s, 2H), 8.80 (d, *J* = 5.0 Hz, 1H), 8.48–8.41 (m, 1H), 8.05 (d, *J* = 8.0 Hz, 1H), 7.87 (t, *J* = 6.5 Hz, 1H), 7.47–7.43 (m, 2H), 7.41–7.33 (m, 4H), 7.07–7.02 (m, 3H), 6.49 (d, *J* = 3.5 Hz, 1H), 5.33 (s, 2H), 3.46–3.40 (m, 4H), 3.19 (br s, 4H). <sup>13</sup>C NMR (125 MHz, DMSO-*d*<sub>6</sub>) δ 158.5, 153.6, 153.0, 149.8, 146.0, 142.6, 133.8, 133.3, 129.0, 128.8, 127.9, 125.8, 125.5, 125.4, 120.1, 116.3, 108.2, 52.0, 45.1, 42.5. Mass calcd for C<sub>27</sub>H<sub>26</sub>ClN<sub>4</sub>O<sub>2</sub><sup>+</sup> (M+H)<sup>+</sup> 473.17388; Found 473.17361.

## Section II: Compound **25** kinase counter screen

### (A) Against CarnaBiosciences kinases<sup>a</sup>

| Kinase               | % activity remaining | Kinase       | % activity remaining | Kinase    | % activity remaining |
|----------------------|----------------------|--------------|----------------------|-----------|----------------------|
| Abl(h)               | 134                  | GSK3β(h)     | 130                  | PKCδ(h)   | 88                   |
| ACK1(h)              | 109                  | Haspin(h)    | 60                   | PKCι(h)   | 103                  |
| ALK(h)               | 92                   | Hck(h)       | 112                  | PKCμ(h)   | 88                   |
| ALK4(h)              | 97                   | HIPK1(h)     | 114                  | PKCθ(h)   | 117                  |
| Arg(h)               | 58                   | HIPK3(h)     | 119                  | PKCζ(h)   | 98                   |
| ARK5(h)              | 100                  | IKKα(h)      | 119                  | PKD2(h)   | 95                   |
| ASK1(h)              | 110                  | IR(h)        | 97                   | PKG1α(h)  | 128                  |
| Aurora-A(h)          | 111                  | IRR(h)       | 117                  | PKG1β(h)  | 142                  |
| Axl(h)               | 110                  | Itk(h)       | 115                  | Plk1(h)   | 115                  |
| Bmx(h)               | 102                  | JAK2(h)      | 127                  | Plk3(h)   | 84                   |
| BRK(h)               | 117                  | JAK3(h)      | 106                  | PRK2(h)   | 101                  |
| BrSK1(h)             | 126                  | JNK3(h)      | 145                  | PrKX(h)   | 102                  |
| BrSK2(h)             | 118                  | KDR(h)       | 117                  | PTK5(h)   | 95                   |
| CaMKI(h)             | 79                   | LOK(h)       | 104                  | Pyk2(h)   | 121                  |
| CaMKIIβ(h)           | 79                   | MAPK1(h)     | 92                   | Ret(h)    | 106                  |
| CaMKIIγ(h)           | 125                  | MAPKAP-K2(h) | 8                    | RIPK2(h)  | 113                  |
| CaMKIIδ(h)           | 100                  | MARK1(h)     | 107                  | Ron(h)    | 105                  |
| CDK2/cyclinA(h)      | 97                   | MELK(h)      | 112                  | Ros(h)    | 113                  |
| CDK7/cyclinH/MAT1(h) | 101                  | Mer(h)       | 98                   | Rse(h)    | 99                   |
| CDK9/cyclin T1(h)    | 119                  | MINK(h)      | 103                  | Rsk1(h)   | 107                  |
| CHK2(h)              | 95                   | MLCK(h)      | 93                   | Rsk1(r)   | 75                   |
| CK1γ1(h)             | 105                  | MLK1(h)      | 106                  | Rsk2(h)   | 119                  |
| CK1γ2(h)             | 120                  | Mnk2(h)      | 101                  | Rsk3(h)   | 96                   |
| CK1γ3(h)             | 30                   | MRCKα(h)     | 96                   | Rsk4(h)   | 136                  |
| CK1δ(h)              | 105                  | MSK1(h)      | 103                  | SAPK2a(h) | 117                  |
| CK2(h)               | 60                   | MSSK1(h)     | 88                   | SGK(h)    | 90                   |
| CLK2(h)              | 91                   | mTOR(h)      | 110                  | SGK2(h)   | 125                  |
| cKit(h)              | 73                   | MuSK(h)      | 137                  | SGK3(h)   | 135                  |

|                   |     |                                                 |     |                  |     |
|-------------------|-----|-------------------------------------------------|-----|------------------|-----|
| CSK(h)            | 107 | NEK2(h)                                         | 115 | SIK(h)           | 134 |
| c-RAF(h)          | 97  | NEK11(h)                                        | 102 | SRPK1(h)         | 120 |
| DAPK1(h)          | 132 | NLK(h)                                          | 121 | SRPK2(h)         | 101 |
| DAPK2(h)          | 92  | p70S6K(h)                                       | 93  | STK33(h)         | 76  |
| DRAK1(h)          | 131 | PAK2(h)                                         | 109 | Syk(h)           | 137 |
| DYRK2(h)          | 103 | PAR-1B $\alpha$ (h)                             | 97  | TAK1(h)          | 112 |
| EGFR(h)           | 103 | PASK(h)                                         | 61  | TAO1(h)          | 86  |
| EphA1(h)          | 100 | PDK1(h)                                         | 110 | TAO3(h)          | 121 |
| EphB1(h)          | 91  | PhK $\gamma$ 2(h)                               | 98  | TBK1(h)          | 117 |
| ErbB4(h)          | 100 | PI3 Kinase<br>(p110 $\beta$ /p85 $\alpha$ )(h)  | 102 | Tec(h) activated | 80  |
| FAK(h)            | 119 | PI3 Kinase (p120 $\gamma$ )(h)                  | 93  | Tie2(h)          | 98  |
| FGFR1(h)          | 113 | PI3 Kinase<br>(p110 $\delta$ /p85 $\alpha$ )(h) | 88  | TLK2(h)          | 100 |
| FGFR1(V561M)(h)   | 90  | PI3 Kinase<br>(p110 $\alpha$ /p85 $\alpha$ )(m) | 100 | TrkA(h)          | 105 |
| FGFR2(h)          | 104 | Pim-1(h)                                        | 57  | TrkB(h)          | 101 |
| FGFR2(N549H)(h)   | 112 | Pim-2(h)                                        | 133 | TSSK1(h)         | 101 |
| FGFR3(h)          | 95  | Pim-3(h)                                        | 91  | TSSK2(h)         | 118 |
| Flt4(h)           | 120 | PKA(h)                                          | 86  | ULK2(h)          | 110 |
| GCK(h)            | 126 | PKB $\alpha$ (h)                                | 105 | WNK2(h)          | 118 |
| GRK5(h)           | 87  | PKB $\beta$ (h)                                 | 116 | VRK2(h)          | 93  |
| GRK6(h)           | 100 | PKB $\gamma$ (h)                                | 120 | ZIPK(h)          | 80  |
| GRK7(h)           | 110 | PKC $\alpha$ (h)                                | 100 |                  |     |
| GSK3 $\alpha$ (h) | 109 | PKC $\beta$ I(h)                                | 105 |                  |     |

<sup>a</sup> Screen was performed in duplicate @ 10  $\mu$ M.

## (B) In-house kinase assays

| Kinase              | IC50 (nM) |
|---------------------|-----------|
| AKT1                | >30000    |
| CaMKIV(h)           | >30000    |
| CDK2/cycA           | >30000    |
| CHK1(h)             | >30000    |
| CSNK1D              | >30000    |
| EGFR                | >30000    |
| EPHB4               | >30000    |
| ERK2                | >30000    |
| FLT3                | >30000    |
| GSK3B               | >30000    |
| IGF-1R(h)           | >30000    |
| IKK $\beta$ (h)     | >30000    |
| IRAK4(h)            | >30000    |
| JNK1 $\alpha$ .1(h) | >30000    |
| KDR                 | >30000    |
| Lck(h)              | >30000    |
| Met(h)              | >30000    |
| MST1(h)             | >30000    |
| MST2                | >30000    |

|            |        |
|------------|--------|
| NEK2       | >30000 |
| PKCA       | >30000 |
| PLK3       | >30000 |
| ROCK-II(h) | >30000 |
| RSK2       | >30000 |
| TSSK2(h)   | >30000 |

### Section III: Compound **25** CYP (cytochrome p450) inhibition data and experimental protocol

|         |                                                                         |
|---------|-------------------------------------------------------------------------|
| CYP 3A4 | Co. IC <sub>50</sub> > 20 $\mu$ M<br>Pre. IC <sub>50</sub> > 20 $\mu$ M |
| CYP 2D6 | Co. IC <sub>50</sub> > 20 $\mu$ M<br>Pre. IC <sub>50</sub> > 20 $\mu$ M |
| CYP 2C9 | Co. IC <sub>50</sub> > 20 $\mu$ M<br>Pre. IC <sub>50</sub> > 20 $\mu$ M |

In order to assess the potential for inhibition of CYPs, human liver microsomes were incubated with several concentrations of tested articles (0.2, 2 and 20  $\mu$ M), 1 mM reduced nicotinamide adenine dinucleotide phosphate (NADPH) and substrates for various CYPs at 37 °C. The substrate concentration was kept near the Km value for each CYP reaction. They were 16  $\mu$ M dextromethorphan (Odemethylase reaction) for CYP2D6, 100  $\mu$ M testosterone (6 $\beta$ -hydroxylase reaction) for CYP3A4 and 200  $\mu$ M tolbutamide (4-hydroxylase reaction) for CYP2C9. The concentrations of the metabolites formed from each substrate after incubation were determined by LCMS/MS using a standard curve. The concentrations at which 50% of the initial enzyme activity was inhibited (IC<sub>50</sub>) were determined from the graph of concentrations versus percent of inhibition.

To evaluate time-dependent inhibition, compound, at the stated concentrations (0.2, 2 and 20  $\mu$ M), was preincubated with human liver microsomes for 30 min at 37 °C in the presence of NADPH and in the absence of substrates. After the pre-incubation step, the CYP substrates were added at the previously stated concentrations and the reactions were allowed to proceed as indicated in the previous paragraph.

### Section IV: Dissociation-Enhanced Lanthanide Fluorescent Immunoassay (DELFI) Enzyme Assay Protocol

All steps are carried out at room temperature. Active MK2 kinase (UPSTATE # 14-337) diluted into 2X reaction buffer\* to prepare a 5 nM kinase concentration was combined in black polypropylene 96 well plates with compound prepared in 25% DMSO. Following a 30 minute pre-incubation, 20  $\mu$ L of 6  $\mu$ M Acam peptide (1411B Autocam Biotinylated Peptide; Cell Signaling Technologies) was added and the reaction is allowed to proceed for 10 minutes. The reaction was terminated by transfer of 10 microliters into 190 microliters of DELFIA Assay buffer, 10 mM in EDTA (Perkin-Elmer # 4002-0010) in Streptavidin plates (Roche Diagnostics Corp. #117347760001). After 1 hour of shaking the plates were washed (DELFI wash buffer 4010-0010) and detection antibodies (Cell Signaling Technologies #9386; Perkin Elmer # AD0124) diluted into DELFIA Assay buffer were added to wells for 1 hour incubation. Following the antibody incubation the plates were washed a second time. Enhancement

solution (Perkin Elmer# 4001-0010) was added to the wells and after 10 minutes of shaking, activity (Europium fluorescence) read on a Wallac Victor 1420 plate reader.

\*FINAL 1X REACTION BUFFER:

20 mM HEPES pH 7.3

2/100  $\mu$ M ATP

50 mM NaCl

10 mM  $MgCl_2$

1 mM dithiothreitol

## Section V: Effect of Synthetic and Natural Substrate on MK2 Inhibition

To confirm the equivalence in enzymatic IC<sub>50</sub> results using either synthetic substrate, Acam peptide, or natural substrate, HSP27, ALIS hit compound **1** and optimized analog **26** were assayed in DELFIA using both substrates, and the results were shown below. The resemblance in both the IC<sub>50</sub> value and curve shape demonstrated equivalent inhibitor activity against an artificial peptide substrate and a natural substrate.

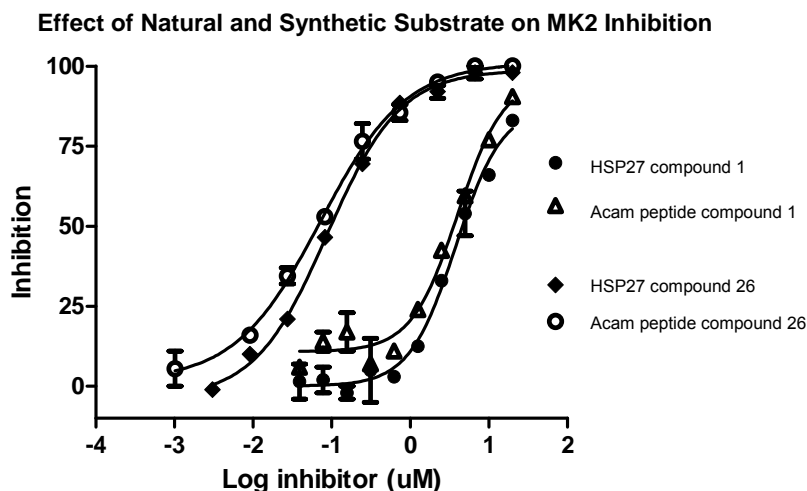

|                             | Compound 1 |      | Compound 26 |       |
|-----------------------------|------------|------|-------------|-------|
|                             | HSP27      | Acam | HSP27       | Acam  |
| IC <sub>50</sub> ( $\mu$ M) | 3.81       | 4.01 | 0.088       | 0.072 |
| HillSlope                   | 1.47       | 1.48 | 0.94        | 0.80  |

## HSP27 Natural Substrate Assays

DELFLIA assays carried out with biotinylated HSP27 as substrate were performed according to the standard assay procedure. Biotinylated HSP27 DELFLIA assay substrate was prepared by biotinylation of HSP27 recombinant protein (RayBiotech, Inc.# IP-16-027P) with biotinylation kit #21955 from Thermo Scientific Research.

## Section VI: Assay of HSP27 phosphorylation in SW1353 cells and SW1353 cell viability

Changes in IL-1 $\beta$ -stimulated HSP27 phosphorylation in SW1353 chondrosarcoma cells were measured using an in-cell ELISA method. SW1353 cells (ATCC; Rockville, MD) were routinely

grown in a medium consisting of DMEM containing 10% FBS, 2 mM GlutaMAX I (Invitrogen), 1X penicillin-streptomycin (Gibco #15070; Invitrogen) and 0.1 mM non-essential amino acids at 37 °C in 5% atmospheric CO<sub>2</sub>. One day prior to assay, cells were collected and suspended in serum-free medium and added to a 96-well assay culture plate at 6.0x10<sup>3</sup> cells/100 uL/well and the plate incubated overnight at 37 °C and 5% CO<sub>2</sub>. Cells were pre-treated with serially diluted test compounds for 30 min. prior to stimulation with IL-1β (100 pg/mL) for 27 min. Growth medium was then immediately aspirated off the cells and they were fixed with 4% formaldehyde in PBS for 20min. Specific detection of HSP27 serine 209 phosphorylation was then performed using the HSP27 FACE Kit #48350 (Active Motif; Carlsbad, CA) and specifically following the manufacturer's protocols. Cell viability after compound exposure was determined indirectly by measuring cellular total ATP content in a sister plate set up identically to the SW1353 HSP27 phosphorylation assay plate. Cellular ATP content was measured by employing a commercially available ATP-dependent luciferase-based luminescent assay kit and following the manufacturer's protocol (CellTiter-Glo; Promega # G7571).

Section VII: Assay of MMP-13 secretion from SW1353 cells and human primary osteoarthritis-derived chondrocytes.

Cells in DMEM containing 10% FBS, 2 mM GlutaMAX I (Invitrogen), 1X penicillin-streptomycin (Gibco #15070; Invitrogen) and 0.1 mM non-essential amino acids were distributed at 5.0x10<sup>3</sup> cells/100μl/well in a 96-well plate and cultured overnight at 37 °C in 5% atmospheric CO<sub>2</sub>. The following day the culture medium in all wells was exchanged with 100 uL of the same supplemented with 0.5% lactalbumin hydrolysate (Sigma-Aldrich; Cat. No. L9010) and then cells were further cultured for 6 hours before compound addition. After 30 minutes of treatment with varying concentrations of compound **25** the cells were stimulated with IL-1β (20 ng/mL) for 24 hours and then MMP-13 in the supernatant was specifically measured by ELISA using a commercial kit and protocol as described by the manufacturer (GE Healthcare; R&D Systems; Cat. No. RPN2621). Effect of compound **25** on MMP-13 secreted from human primary chondrocytes was assessed by the same method as used for SW1353 cells. The primary human adult chondrocytes were obtained as cryopreserved samples from a commercial vendor that obtained them from needle biopsies of patients undergoing knee replacement surgery.

Section VIII: Assay of TNFα and IL6 secretion from THP1 cells.

THP1 cells were obtained from ATCC (Cat. No. TIB-202) and cultured in medium consisting of RPMI1640 supplemented with 2mM L-glutamine, 1.5g/L sodium bicarbonate, 4.5 g/L glucose, 10% fetal bovine serum, 10 mM HEPES, 1 mM sodium pyruvate and 50 μM 2-mercaptoethanol. Cells were plated into the wells of 96-well culture plates at 0.5 X 10<sup>5</sup> and 0.5 X 10<sup>4</sup> cells/well for TNFα and IL6 assays, respectively, then cultured for 60 mins to allow pre-equilibration, and then treated with varying concentrations of compound **25** for 30 mins prior to addition of LPS (Sigma-Aldrich, Cat. No. L2654) at 1 ug/mL. After 3 and 18 hours of culture for TNFα and IL6 assays, respectively, supernatants were removed and secreted cytokines were measured using commercially available kits and manufacturer's protocols. Secreted TNFα was specifically measured by an ELISA method (R&D Systems; Cat. No. DTA00C)



whereas IL6 was specifically measured by an immunoabsorbant-based electrochemical luminescence assay (MesoScale Discovery, Cat. No. K151AKB-2).

## Section IX: Enzymatic Analysis of Mode of Inhibition Assays

Mode of inhibition assays were performed according to the standard assay protocol with the following exceptions. The ATP concentration was 100  $\mu\text{M}$  and the Acam peptide concentration was varied from 0 to 200  $\mu\text{M}$ . Stopped reaction aliquots containing more than 3  $\mu\text{M}$  in Acam peptide were diluted to 3  $\mu\text{M}$  concentration prior to addition to a streptavidin plate.

Fluorescence values obtained from these wells were corrected for dilution prior to analysis.

Methods:

Compound 1 inhibition data fit to noncompetitive inhibition model with Graph Pad Prizm 5.02.

Global evaluation of inhibition models:

Goodness of fit to kinetic models was evaluated by the method of Akaike<sup>1</sup> using the Sigma Plot Enzymes Kinetics Module.

## Section X: Compound 25 PK data<sup>2</sup>

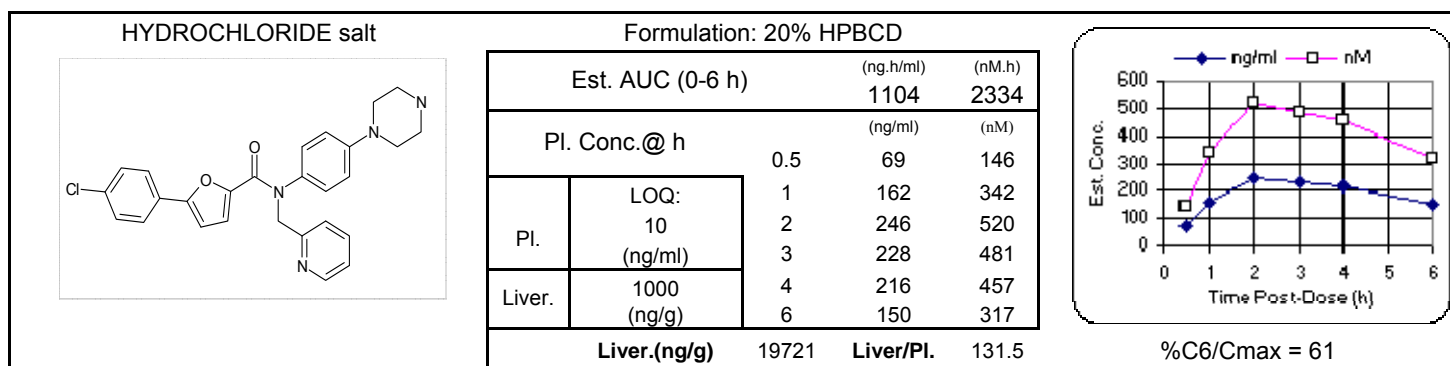

HPBCD: hydroxypropyl- $\beta$ -cyclodextrin.

LOQ: limit of quantification.

## Reference

(1) Akaike, H. An information criterion (AIC). *Math. Sci.* **1976**, *14*, 5.

(2) Mei, H.; Korfmacher, W.; Morrison, R. Rapid in vivo oral screening in rats: reliability, acceptance criteria, and filtering efficiency. *The AAPS Journal* **2006**, *8*, E493.
